# Supplementary material for: All coffee types decrease the risk of adverse clinical outcomes in chronic liver disease: a UK Biobank study
Source: Springer Nature journal article supplement (doi:10.1186/s12889-021-10991-7), 2021-06-21
Supplement: MOESM1 [file 19279538]

# All coffee types decrease the risk of adverse clinical outcomes in chronic liver disease: A UK Biobank study

Oliver J. Kennedy<sup>1</sup>, Jonathan A. Fallowfield<sup>2</sup>, Robin Poole<sup>1</sup>, Peter C. Hayes<sup>2</sup>, Julie Parkes<sup>1</sup> and Paul J. Roderick<sup>1</sup>

1. Primary Care & Population Sciences Faculty of Medicine, University of Southampton, Southampton, SO17 1BJ, UK

2. University of Edinburgh Centre for Inflammation Research, Queen's Medical Research Institute, Edinburgh Bioquarter, Edinburgh, EH16 4TJ, UK

## Supplementary information

### Figures

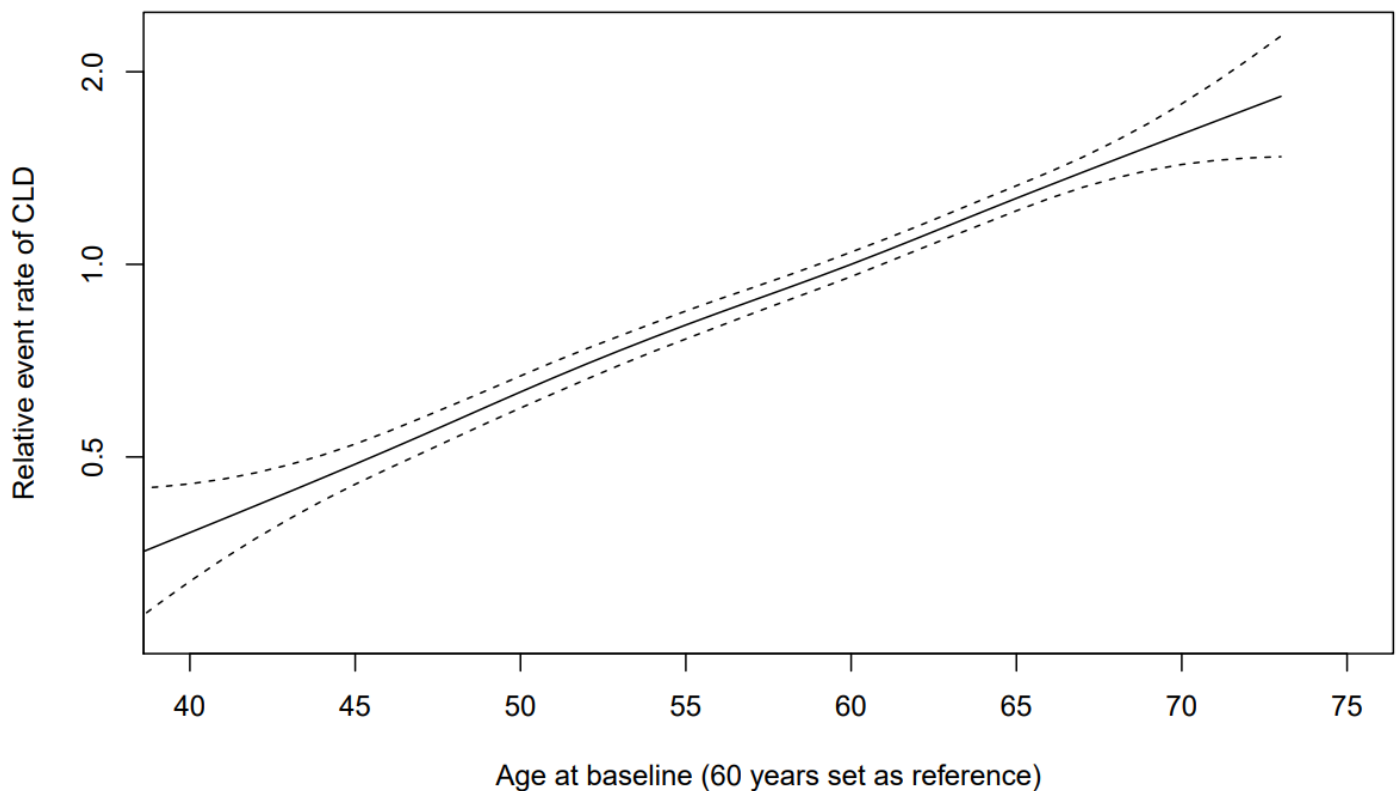

**Supplementary figure 1.** A graph showing the association of age with the relative event rate of chronic liver disease as modelled using a penalised spline.

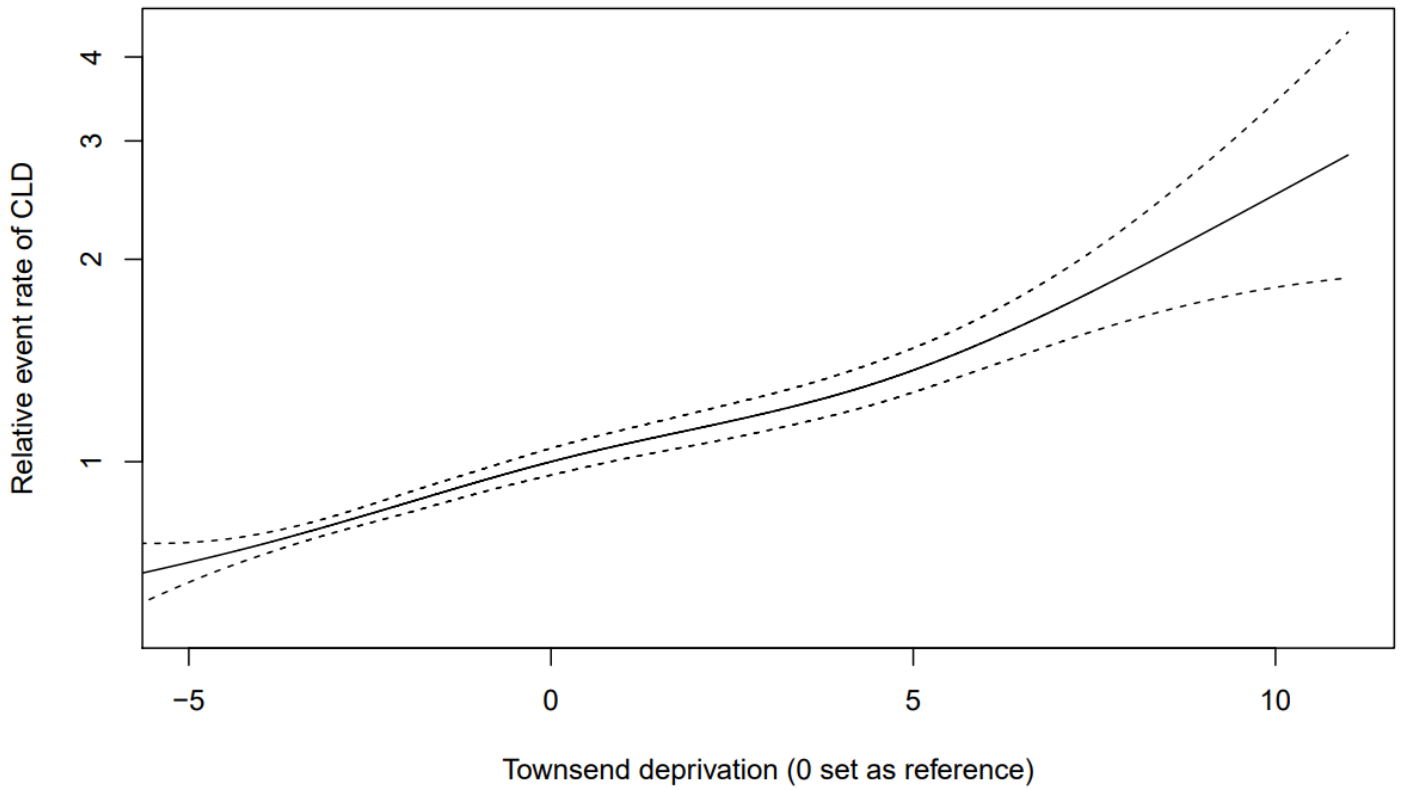

**Supplementary figure 2.** A graph showing the association of Townsend deprivation index with the relative event rate of chronic liver disease as modelled using a penalised spline.

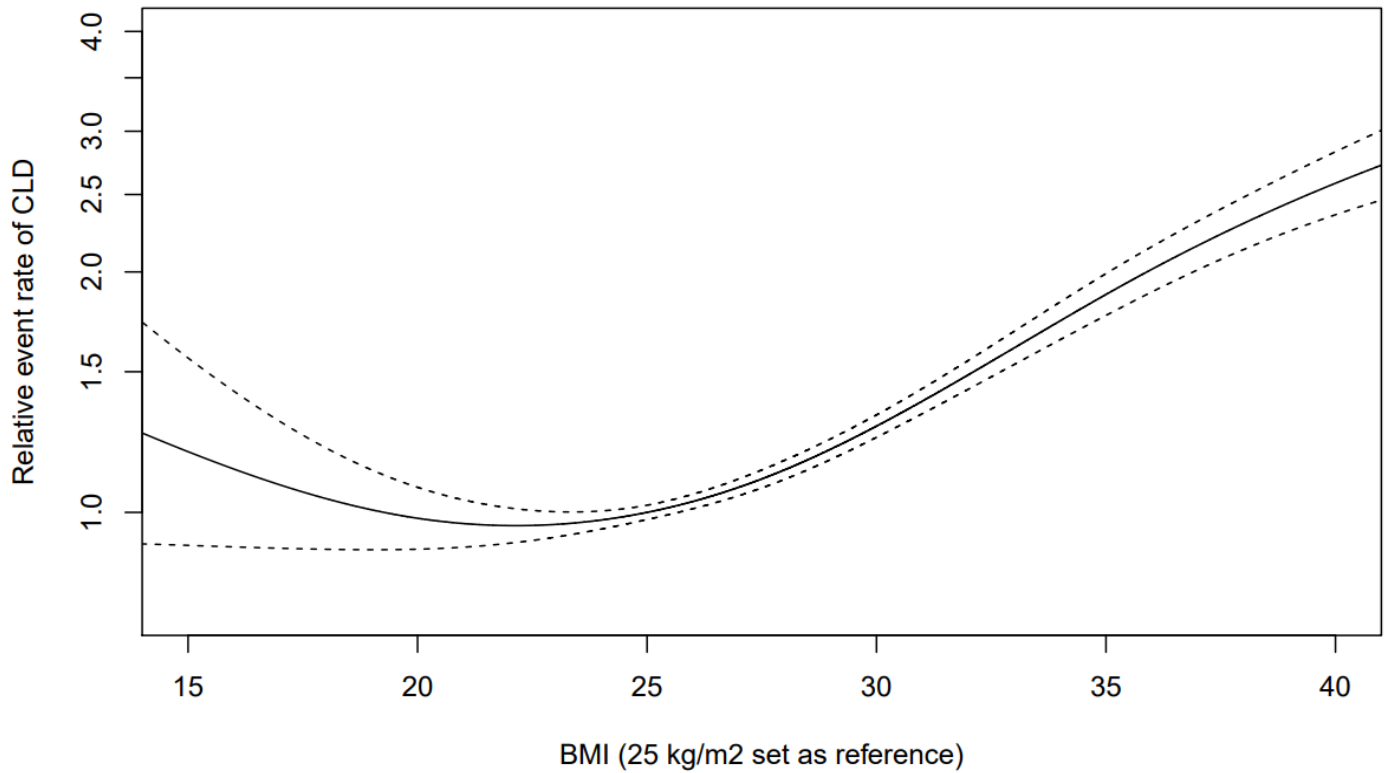

**Supplementary figure 3.** A graph showing the association of body mass index with the relative event rate of chronic liver disease as modelled using a penalised spline.

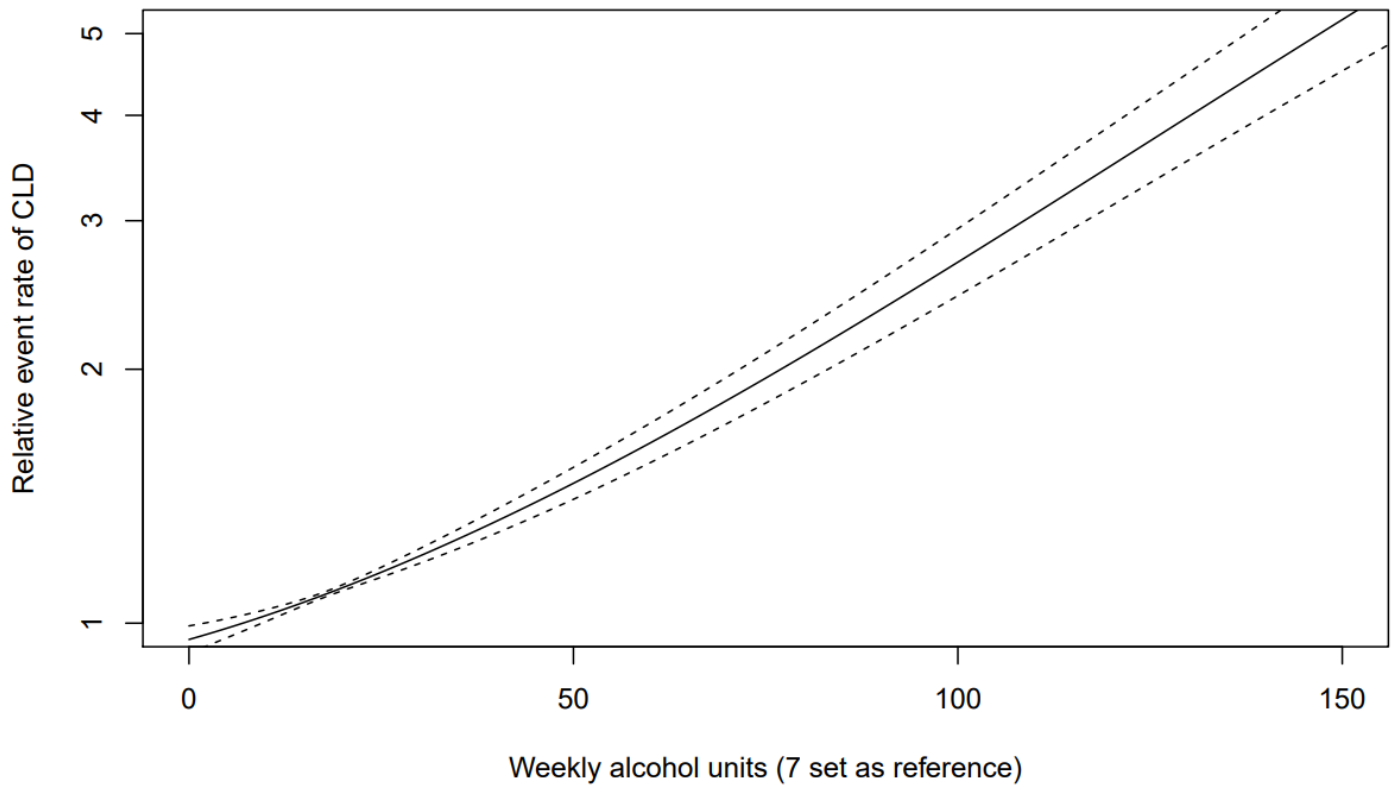

**Supplementary figure 4.** A graph showing the association of weekly alcohol units with the relative event rate of chronic liver disease as modelled using a penalised spline.

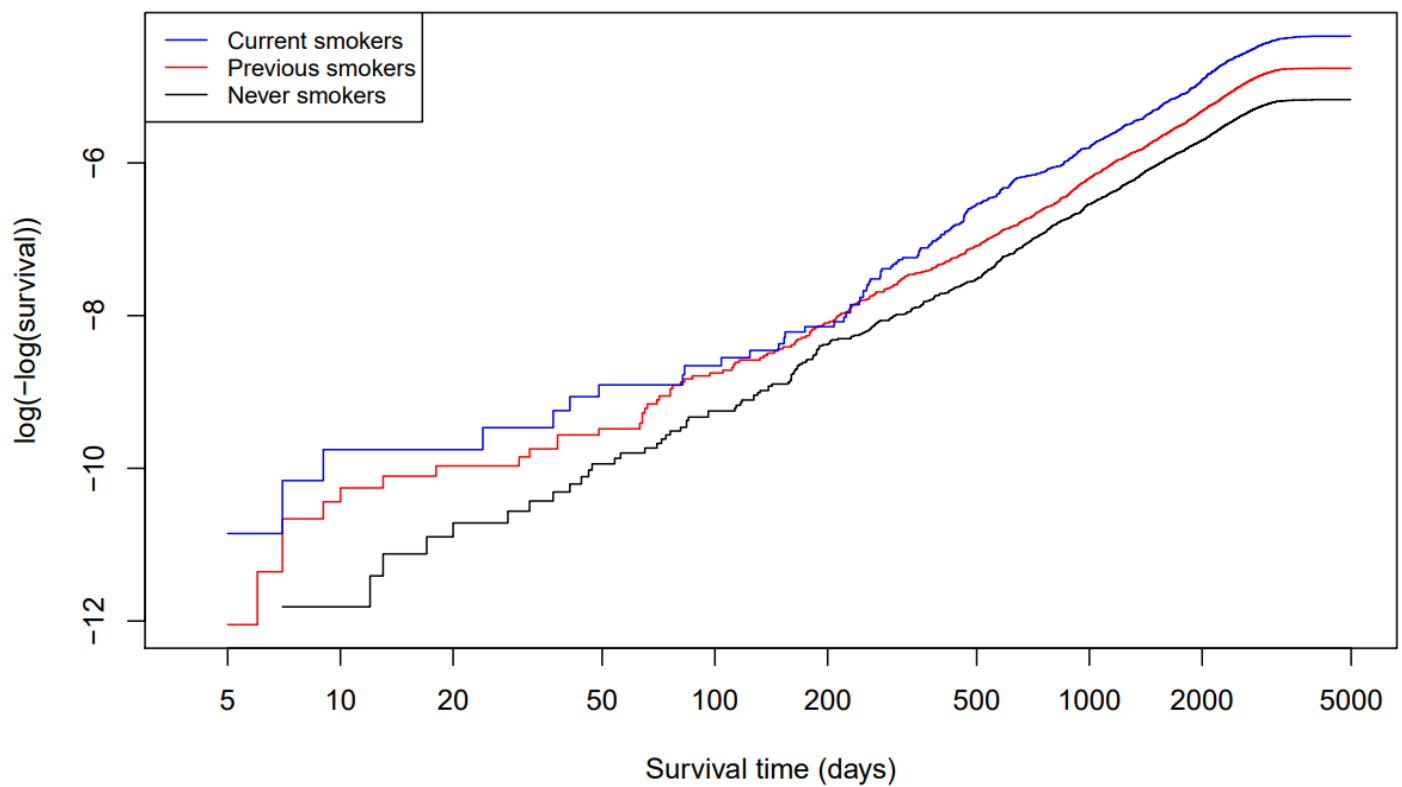

**Supplementary figure 5.** A log(-log) plot for chronic liver disease and smoking status.

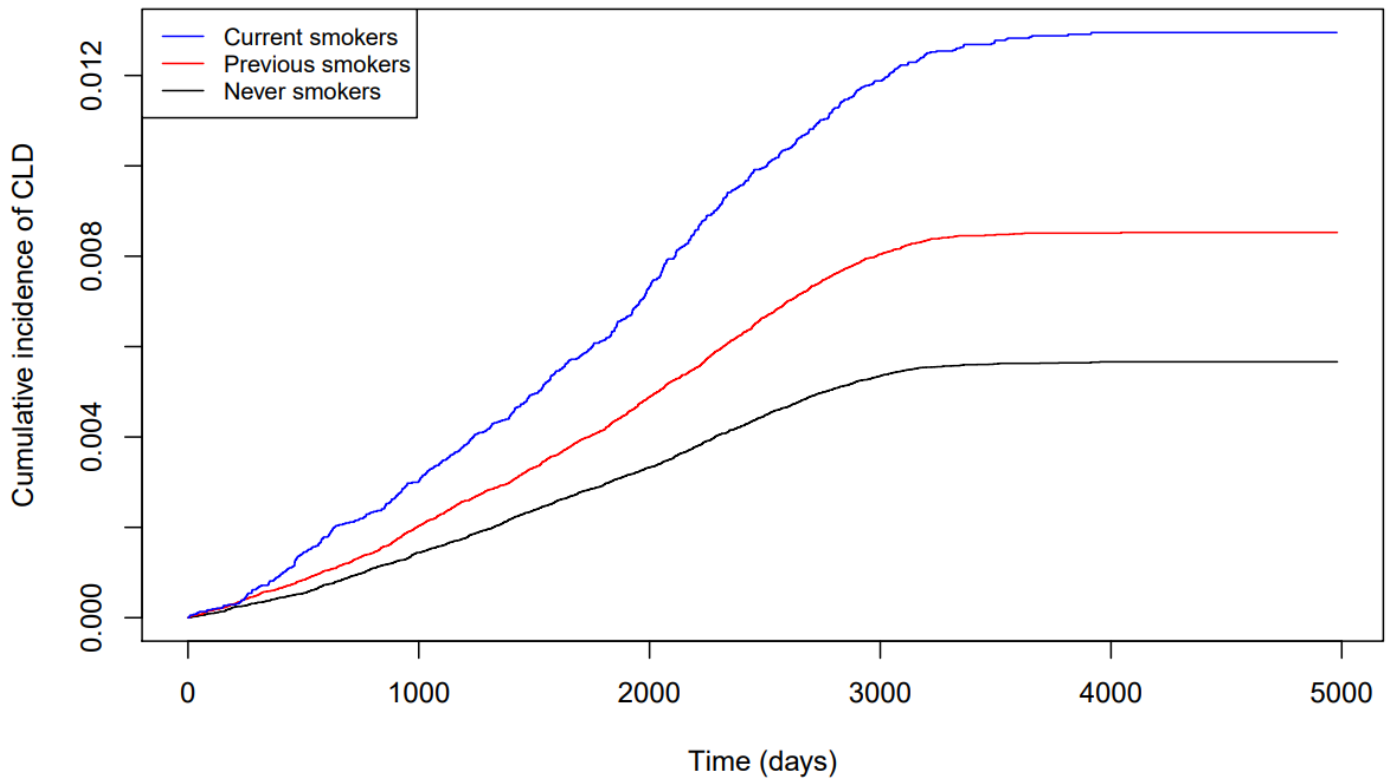

**Supplementary figure 6.** A plot showing the cumulative incidence of chronic liver disease according to smoking status

## Tables

**Supplementary table 1.** UK Biobank participants were asked to specify amounts of different alcohol types consumed each week or month. This table details the assumptions used to calculate “unit” equivalents (1 unit is equal to 10 mL of pure ethanol) for each drink.

| Drink type                      | Units equivalent                                |
|---------------------------------|-------------------------------------------------|
| Measure of spirit               | 1                                               |
| Glass of fortified wine         | 1.25 (i.e. 12 glasses in 750 mL 20% vol bottle) |
| Other alcoholic drink           | 1.5 (i.e. one Smirnoff Ice)                     |
| Pint of beer or cider           | 2.5 (i.e. 568 mL of 4% vol)                     |
| Glass of white wine / Champaign | 1.75 (i.e. 6 glasses in 750 mL 14% vol bottle)  |
| Glass of red wine               | 1.75 (i.e. 6 glasses in 750 mL 14% vol bottle)  |

**Supplementary table 2.** Baseline characteristics of the UK Biobank cohort according to the availability of baseline weekly alcohol units.

|                                    | Weekly alcohol units available | No weekly alcohol units available |
|------------------------------------|--------------------------------|-----------------------------------|
| n                                  | 415961                         | 80854                             |
| Median age at baseline (IQR)       | 58 (13)                        | 57 (14)                           |
| Sex (% female)                     | 52.3                           | 65.7                              |
| <b>Ethnicity (%)</b>               |                                |                                   |
| White                              | 94.4                           | 92.1                              |
| Other ethnicity                    | 5.3                            | 7.4                               |
| Unknown                            | 0.3                            | 0.6                               |
| Median Townsend deprivation score  | -2.21                          | -1.79                             |
| Median coffee consumption (cups/d) | 2                              | 1                                 |
| <b>Alcohol frequency (%)</b>       |                                |                                   |
| Never                              | 9.5                            | 0                                 |
| Special occasions only             | 4.9                            | 45.6                              |
| One to three times a month         | 4.5                            | 44.9                              |
| Once or twice a week               | 30.2                           | 3.2                               |
| Three or four times a week         | 27.1                           | 2.3                               |
| Daily or almost daily              | 23.8                           | 2.1                               |
| Unknown                            | 0                              | 0.7                               |
| <b>Diabetes</b>                    |                                |                                   |
| Yes                                | 4.9                            | 6.7                               |
| No                                 | 94.8                           | 91.6                              |
| Unknown                            | 0.3                            | 1.7                               |
| <b>Median BMI (IQR)</b>            | 26.6 (5.6)                     | 27.4 (6.7)                        |
| <b>Smoking</b>                     |                                |                                   |
| Never                              | 53.8                           | 58.2                              |
| Previous                           | 35.7                           | 27.9                              |

| Current Unknown            | 10-1<br>0-3 | 12-1<br>1-8 |
|----------------------------|-------------|-------------|
| CLD cases (%)              | 2950 (0.71) | 670 (0.83)  |
| CLD or steatosis cases (%) | 4401 (1.06) | 1070 (1.32) |
| HCC cases (%)              | 154 (0.04)  | 30 (0.04)   |
| CLD deaths (%)             | 266 (0.06)  | 36 (0.04)   |

Abbreviations: IQR (interquartile range), BMI (body mass index), CLD (chronic liver disease), HCC (hepatocellular carcinoma)

**Supplementary tables 3a, 3b and 3c.** Conditions corresponding to ICD-10 codes, ICD-9 codes and self-reported diagnoses that were used to exclude participants at baseline who may have had CLD. The ICD codes were used to identify condition recorded in hospital and cancer records before recruitment. The self-reported diagnoses were disclosed during interview at a baseline assessment centre visit.

**Table 3a**

| ICD-10 codes                                                                 |
|------------------------------------------------------------------------------|
| B18-0 Chronic viral hepatitis B with delta-agent                             |
| B18-1 Chronic viral hepatitis B without delta-agent                          |
| B18-2 Chronic viral hepatitis C                                              |
| B18-8 Other chronic viral hepatitis                                          |
| B18-9 Chronic viral hepatitis, unspecified                                   |
| B19-0 Unspecified viral hepatitis with coma                                  |
| B19-9 Unspecified viral hepatitis without coma                               |
| B58-1 Toxoplasma hepatitis                                                   |
| B25-1 Cytomegaloviral hepatitis                                              |
| C22-0 Liver cell carcinoma                                                   |
| C22-1 Intrahepatic bile duct carcinoma                                       |
| C22-2 Hepatoblastoma                                                         |
| C22-3 Angiosarcoma of liver                                                  |
| C22-4 Other sarcomas of liver                                                |
| C22-7 Other specified carcinomas of liver                                    |
| C22-9 Liver, unspecified (malignancy)                                        |
| C78-7 Secondary malignant neoplasm of liver                                  |
| D01-5 Liver, gallbladder and bile ducts (carcinoma)                          |
| D37-6 Liver, gallbladder and bile ducts (neoplasm of uncertain significance) |
| I85-0 Oesophageal varices with bleeding                                      |
| I85-9 Oesophageal varices without bleeding                                   |
| I86-4 Gastric varices                                                        |
| I98-2 Oesophageal varices in diseases classified elsewhere                   |
| I98-3 Oesophageal varices with bleeding in diseases classified elsewhere     |
| K70-0 Alcoholic fatty liver                                                  |
| K70-1 Alcoholic hepatitis                                                    |
| K70-2 Alcoholic fibrosis and sclerosis of liver                              |
| K70-3 Alcoholic cirrhosis of liver                                           |
| K70-4 Alcoholic hepatic failure                                              |
| K70-9 Alcoholic liver disease, unspecified                                   |
| K71-0 Toxic liver disease with cholestasis                                   |
| K71-1 Toxic liver disease with hepatic necrosis                              |
| K71-2 Toxic liver disease with acute hepatitis                               |
| K71-3 Toxic liver disease with chronic persistent hepatitis                  |
| K71-4 Toxic liver disease with chronic lobular hepatitis                     |
| K71-5 Toxic liver disease with chronic active hepatitis                      |
| K71-6 Toxic liver disease with hepatitis, not elsewhere classified           |
| K71-7 Toxic liver disease with fibrosis and cirrhosis of liver               |
| K71-8 Toxic liver disease with other disorders of liver                      |
| K71-9 Toxic liver disease, unspecified                                       |
| K72-0 Acute and subacute hepatic failure                                     |
| K72-1 Chronic hepatic failure                                                |
| K72-9 Hepatic failure, unspecified                                           |
| K73-0 Chronic persistent hepatitis, not elsewhere classified                 |
| K73-1 Chronic lobular hepatitis, not elsewhere classified                    |
| K73-2 Chronic active hepatitis, not elsewhere classified                     |
| K73-8 Other chronic hepatitis, not elsewhere classified                      |
| K73-9 Chronic hepatitis, unspecified                                         |
| K74-0 Hepatic fibrosis                                                       |
| K74-1 Hepatic sclerosis                                                      |
| K74-2 Hepatic fibrosis with hepatic sclerosis                                |
| K74-3 Primary biliary cirrhosis                                              |
| K74-4 Secondary biliary cirrhosis                                            |
| K74-5 Biliary cirrhosis, unspecified                                         |
| K74-6 Other and unspecified cirrhosis of liver                               |
| K75-0 Abscess of liver                                                       |
| K75-1 Phlebitis of portal vein                                               |
| K75-2 Nonspecific reactive hepatitis                                         |
| K75-3 Granulomatous hepatitis, not elsewhere classified                      |
| K75-4 Autoimmune hepatitis                                                   |
| K75-8 Other specified inflammatory liver diseases                            |
| K75-9 Inflammatory liver disease, unspecified                                |

|                                                                                 |
|---------------------------------------------------------------------------------|
| K76-0 Fatty (change of) liver, not elsewhere classified                         |
| K76-1 Chronic passive congestion of liver                                       |
| K76-2 Central haemorrhagic necrosis of liver                                    |
| K76-3 Infarction of liver                                                       |
| K76-4 Peliosis hepatis                                                          |
| K76-5 Hepatic veno-occlusive disease                                            |
| K76-6 Portal hypertension                                                       |
| K76-7 Hepatorenal syndrome                                                      |
| K76-8 Other specified diseases of liver                                         |
| K76-9 Liver disease, unspecified                                                |
| K77-0 Liver disorders in infectious and parasitic diseases classified elsewhere |
| K77-8 Liver disorders in other diseases classified elsewhere                    |
| O26-6 Liver disorders in pregnancy, childbirth and the puerperium               |
| Q44-6 Cystic disease of liver                                                   |
| Q44-7 Other congenital malformations of liver                                   |
| T86-4 Liver transplant failure and rejection                                    |
| Z52-6 Liver donor                                                               |
| Z94-4 Liver transplant status                                                   |
| P35-3 Congenital viral hepatitis                                                |
| R18 Ascites                                                                     |
| Z22-5 Carrier of viral hepatitis                                                |

Abbreviations: ICD-10 (International Classification of Diseases 10th Revision)

**Table 3b**

| ICD-9 codes                                                                                               |
|-----------------------------------------------------------------------------------------------------------|
| 0702 Viral hepatitis b with hepatic coma                                                                  |
| 0703 Viral hepatitis b without mention of hepatic coma                                                    |
| 0704 Other specified viral hepatitis with hepatic coma                                                    |
| 0705 Other specified viral hepatitis without mention of hepatic coma                                      |
| 0706 Unspecified viral hepatitis with hepatic coma                                                        |
| 0709 Unspecified viral hepatitis without mention of hepatic coma                                          |
| 1550 Malignant neoplasm of liver, primary                                                                 |
| 2308 Carcinoma in situ of liver and biliary system                                                        |
| 2353 Neoplasm of uncertain behaviour of liver and biliary passages                                        |
| 4560 Oesophageal varices with bleeding                                                                    |
| 4561 Oesophageal varices without mention of bleeding                                                      |
| 4562 Oesophageal varices in cirrhosis of liver                                                            |
| 5710 Alcoholic fatty liver                                                                                |
| 5712 Alcoholic cirrhosis of liver                                                                         |
| 5713 Alcoholic liver damage, unspecified                                                                  |
| 5714 Chronic hepatitis                                                                                    |
| 57150 Cirrhosis of liver without mention of alcohol (congestive)                                          |
| 57151 Cirrhosis of liver without mention of alcohol (postnecrotic)                                        |
| 57152 Cirrhosis of liver without mention of alcohol (childhood function)                                  |
| 57158 Portal fibrosis without cirrhosis of liver without mention of alcohol                               |
| 57159 Cirrhosis of liver without mention of alcohol (other and unspecified)                               |
| 5716 Biliary cirrhosis                                                                                    |
| 5718 Other chronic nonalcoholic liver disease (only included in incident CLD including steatosis outcome) |
| 5719 Unspecified chronic liver disease without mention of alcohol                                         |
| 5723 Portal hypertension                                                                                  |
| 5724 Hepatorenal syndrome                                                                                 |
| 5728 Other sequelae of chronic liver disease                                                              |
| 5731 Hepatitis in viral diseases classified elsewhere                                                     |
| 5732 Hepatitis in other infectious diseases classified elsewhere                                          |
| 5733 Hepatitis unspecified                                                                                |
| 5734 Hepatic infarction                                                                                   |
| 7895 Ascites                                                                                              |
| V026 Carrier or suspected carrier of viral hepatitis                                                      |
| 27103 Glycogenosis (associated with hepatic cirrhosis)                                                    |
| 27761 Other deficiencies of circulating enzymes (alpha-1-antitrypsin hepatitis)                           |
| 75161 Cystic or fibrocystic disease of liver                                                              |
| V427 Liver replaced by transplant                                                                         |
| 5709 Acute and subacute necrosis of liver                                                                 |
| 5728 Other sequelae of chronic liver disease                                                              |
| 5730 Chronic passive congestion of liver                                                                  |
| 6467 Liver disorders in pregnancy                                                                         |
| 7516 Anomalies of gallbladder, bile ducts and liver                                                       |
| 75160 Absence or agenesis of liver, total or part                                                         |
| 75162 Other anomalies of liver                                                                            |
| 9641 Poisoning by liver preparations and other antianaemic agents                                         |

Abbreviation: ICD-9 International Classification of Diseases 9th Revision),

**Table 3c**

|                                               |
|-----------------------------------------------|
| <b>Self-reported conditions</b>               |
| alcoholic liver disease / alcoholic cirrhosis |
| liver/biliary/pancreas problem                |
| liver failure/cirrhosis                       |
| oesophageal varices                           |
| infective/viral hepatitis                     |
| hepatitis b                                   |
| hepatitis c                                   |
| non-infective hepatitis                       |
| liver/hepatocellular cancer                   |
| <b>Self-reported conditions:</b>              |
| alcoholic liver disease / alcoholic cirrhosis |
| liver/biliary/pancreas problem                |
| liver failure/cirrhosis                       |
| oesophageal varices                           |
| infective/viral hepatitis                     |
| hepatitis b                                   |
| hepatitis c                                   |

**Supplementary table 4.** Baseline characteristics of the UK Biobank cohort according to the availability of baseline coffee consumption.

|                                             | <b>Coffee consumption available</b> | <b>No coffee consumption available</b> |
|---------------------------------------------|-------------------------------------|----------------------------------------|
| N                                           | 494585                              | 2230                                   |
| Median age (years) at baseline (IQR)        | 58 (13)                             | 56 (15)                                |
| Sex (% female)                              | 54.5                                | 48.3                                   |
| <b>Ethnicity (%)</b>                        |                                     |                                        |
| White                                       | 94.3                                | 34.9                                   |
| Other ethnicity                             | 5.4                                 | 58.7                                   |
| Unknown                                     | 0.3                                 | 6.4                                    |
| Median Townsend deprivation score           | -2.15                               | 1.43                                   |
| <b>Alcohol frequency (%)</b>                |                                     |                                        |
| Never                                       | 7.9                                 | 16.2                                   |
| Special occasions only                      | 11.5                                | 10.8                                   |
| One to three times a month                  | 11.1                                | 4.3                                    |
| Once or twice a week                        | 25.8                                | 10.6                                   |
| Three or four times a week                  | 23.1                                | 6.1                                    |
| Daily or almost daily                       | 20.4                                | 4.1                                    |
| Unknown                                     | 0.1                                 | 8.2                                    |
| Median units each week (IQR)                | 15.8 (24.5)                         | 0 (11.9)                               |
| <b>Diabetes (%)</b>                         |                                     |                                        |
| Yes                                         | 5.2                                 | 7.4                                    |
| No                                          | 94.5                                | 44.8                                   |
| Unknown                                     | 0.3                                 | 47.8                                   |
| <b>Median BMI in kg/m<sup>2</sup> (IQR)</b> | 26.7 (5.8)                          | 27.7 (6.5)                             |
| <b>Smoking (%)</b>                          |                                     |                                        |
| Never                                       | 54.7                                | 28.9                                   |
| Previous                                    | 34.5                                | 11.9                                   |
| Current                                     | 10.5                                | 11.2                                   |
| Unknown                                     | 0.4                                 | 48.0                                   |
| CLD cases (%)                               | 3600 (0.73)                         | 20 (0.90)                              |
| CLD or steatosis cases (%)                  | 5439 (1.10)                         | 32 (1.43)                              |
| HCC cases (%)                               | 184 (0.04)                          | 0 (0.00)                               |
| CLD deaths (%)                              | 301 (0.06)                          | 1 (0.04)                               |

Abbreviations: IQR (interquartile range), BMI (body mass index), CLD (chronic liver disease), HCC (hepatocellular carcinoma)

**Supplementary table 5.** Baseline characteristics of the UK Biobank cohort and distribution of incident chronic liver disease, incident chronic liver disease or steatosis, death from chronic liver disease and incident hepatocellular carcinoma according to type of coffee consumption.

| <b>Coffee type</b>                   | <b>Decaffeinated</b> | <b>Instant</b> | <b>Ground</b> |
|--------------------------------------|----------------------|----------------|---------------|
| N                                    | 73644                | 212586         | 86987         |
| Median age (years) at baseline (IQR) | 59 (12)              | 58 (13)        | 57 (13)       |
| Sex (% female)                       | 63.1                 | 50.5           | 51.7          |
| <b>Ethnicity (%)</b>                 |                      |                |               |
| White                                | 96.0                 | 95.6           | 96.0          |
| Other ethnicity                      | 3.8                  | 4.1            | 3.5           |
| Unknown                              | 0.3                  | 0.3            | 0.5           |
| Median Townsend deprivation score    | -2.54                | -2.26          | -2.07         |
| <b>Alcohol frequency (%)</b>         |                      |                |               |
| Never                                | 8.1                  | 5.9            | 4.0           |
| Special occasions only               | 13.4                 | 10.6           | 6.0           |
| One to three times a month           | 12.9                 | 11.0           | 8.1           |
| Once or twice a week                 | 27.9                 | 27.2           | 22.1          |
| Three or four times a week           | 22.2                 | 24.2           | 28.8          |
| Daily or almost daily                | 15.4                 | 21.1           | 30.9          |

|                                             |            |             |             |
|---------------------------------------------|------------|-------------|-------------|
| Unknown                                     | 0.1        | 0.1         | 0           |
| Median units each week (IQR)                | 12.8 (20)  | 17.2 (25.2) | 20.2 (25.5) |
| <b>Diabetes (%)</b>                         |            |             |             |
| Yes                                         | 5.0        | 5.4         | 3.9         |
| No                                          | 94.6       | 94.3        | 96.0        |
| Unknown                                     | 0.3        | 0.3         | 0.2         |
| <b>Median BMI in kg/m<sup>2</sup> (IQR)</b> | 26.7 (5.8) | 27.0 (5.7)  | 26.0 (5.4)  |
| <b>Smoking (%)</b>                          |            |             |             |
| Never                                       | 59.5       | 51.3        | 53.3        |
| Previous                                    | 33.4       | 35.7        | 37.1        |
| Current                                     | 6.7        | 12.6        | 9.3         |
| Unknown                                     | 0.4        | 0.4         | 0.2         |
| CLD cases (%)                               | 481 (0.65) | 1625 (0.76) | 477 (0.55)  |
| CLD or steatosis cases (%)                  | 759 (1.03) | 2426 (1.14) | 692 (0.80)  |
| HCC cases (%)                               | 29 (0.04)  | 90 (0.04)   | 20 (0.02)   |
| CLD deaths (%)                              | 23 (0.03)  | 140 (0.07)  | 33 (0.04)   |

**Supplementary table 6.** Baseline characteristics of the UK Biobank cohort and distribution of incident chronic liver disease, incident chronic liver disease or steatosis, death from chronic liver disease and incident hepatocellular carcinoma according to decaffeinated coffee consumption.

| <b>Coffee (cups/d)</b>                      | <b>0</b>    | <b>Half</b> | <b>1</b>    | <b>2</b>   | <b>3</b>    | <b>4</b>   | <b>≥5</b>   |
|---------------------------------------------|-------------|-------------|-------------|------------|-------------|------------|-------------|
| N                                           | 109767      | 6807        | 19406       | 17397      | 11169       | 8094       | 10771       |
| Median age (years) at baseline (IQR)        | 56 (13)     | 58 (13)     | 60 (12)     | 60 (12)    | 60 (12)     | 59 (12)    | 58 (12)     |
| Sex (% female)                              | 58.3        | 66.0        | 65.5        | 63.3       | 62.6        | 60.6       | 59.3        |
| <b>Ethnicity (%)</b>                        |             |             |             |            |             |            |             |
| White                                       | 89.7        | 92.8        | 94.0        | 96.2       | 97.5        | 98.1       | 97.9        |
| Other ethnicity                             | 9.9         | 6.9         | 5.7         | 3.6        | 2.3         | 1.7        | 1.8         |
| Unknown                                     | 0.4         | 0.2         | 0.3         | 0.2        | 0.2         | 0.2        | 0.3         |
| Median Townsend deprivation score           | -1.70       | -2.48       | -2.48       | -2.6       | -2.68       | -2.57      | -2.4        |
| <b>Alcohol frequency (%)</b>                |             |             |             |            |             |            |             |
| Never                                       | 14.4        | 8.6         | 8.8         | 7.5        | 7.0         | 7.4        | 9.0         |
| Special occasions only                      | 15.9        | 15.7        | 14.3        | 12.6       | 12.1        | 12.0       | 14.3        |
| One to three times a month                  | 12.6        | 14.4        | 13.5        | 12.2       | 12.3        | 12.4       | 12.9        |
| Once or twice a week                        | 24.9        | 27.0        | 28.5        | 28.9       | 27.1        | 27.7       | 26.9        |
| Three or four times a week                  | 17.6        | 20.4        | 21.1        | 22.8       | 24.3        | 23.7       | 21.4        |
| Daily or almost daily                       | 14.5        | 13.9        | 13.7        | 16.0       | 17.2        | 16.9       | 15.4        |
| Unknown                                     | 0.1         | 0.1         | 0.1         | 0.1        | 0           | 0          | 0.1         |
| Mean weekly units (IQR)                     | 11 (24.3)   | 11 (19.6)   | 11.5 (19.2) | 13 (19.5)  | 13.8 (20.5) | 14 (21.2)  | 13.5 (22.3) |
| <b>Diabetes (%)</b>                         |             |             |             |            |             |            |             |
| Yes                                         | 5.7         | 4.1         | 5.0         | 4.9        | 5.3         | 5.0        | 5.7         |
| No                                          | 93.9        | 95.6        | 94.6        | 94.8       | 94.5        | 94.7       | 93.9        |
| Unknown                                     | 0.4         | 0.4         | 0.4         | 0.3        | 0.2         | 0.3        | 0.3         |
| <b>Median BMI in kg/m<sup>2</sup> (IQR)</b> | 26.8 (6.1)  | 26.0 (5.7)  | 26.3 (5.6)  | 26.5 (5.5) | 26.8 (5.7)  | 27.2 (5.8) | 27.6 (6.2)  |
| <b>Smoking (%)</b>                          |             |             |             |            |             |            |             |
| Never                                       | 58.6        | 64.9        | 63.4        | 61.2       | 59.5        | 55.8       | 49.2        |
| Previous                                    | 31.3        | 29.5        | 31.6        | 32.6       | 34          | 36.1       | 38.1        |
| Current                                     | 9.7         | 5.2         | 4.8         | 5.8        | 6.1         | 7.7        | 12.3        |
| Unknown                                     | 0.4         | 0.4         | 0.3         | 0.4        | 0.4         | 0.4        | 0.4         |
| <b>CLD cases (n)</b>                        |             |             |             |            |             |            |             |
| Total (%)                                   | 927 (0.84)  | 49 (0.72)   | 124 (0.64)  | 115 (0.66) | 70 (0.63)   | 55 (0.68)  | 68 (0.63)   |
| First 5 years excluded (%)                  | 449 (0.41)  | 134 (1.97)  | 329 (1.70)  | 320 (1.84) | 185 (1.66)  | 122 (1.51) | 213 (1.98)  |
| <b>CLD or steatosis cases (n)</b>           |             |             |             |            |             |            |             |
| Total (%)                                   | 1412 (1.29) | 70 (1.03)   | 189 (0.97)  | 179 (1.03) | 108 (0.97)  | 83 (1.03)  | 130 (1.21)  |
| First 5 years excluded (%)                  | 724 (0.66)  | 41 (0.60)   | 97 (0.50)   | 96 (0.55)  | 54 (0.48)   | 47 (0.58)  | 73 (0.68)   |
| <b>HCC cases (n)</b>                        |             |             |             |            |             |            |             |
| Total (%)                                   | 44 (0.04)   | 0 (0.00)    | 9 (0.05)    | 8 (0.05)   | 6 (0.05)    | 4 (0.05)   | 2 (0.02)    |
| First 5 years excluded (%)                  | 28 (0.03)   | 0 (0.00)    | 6 (0.03)    | 6 (0.03)   | 4 (0.04)    | 4 (0.05)   | 0 (0.00)    |
| <b>CLD deaths</b>                           |             |             |             |            |             |            |             |
| Total (%)                                   | 97 (0.09)   | 3 (<0.01)   | 5 (<0.01)   | 6 (<0.01)  | 3 (<0.01)   | 4 (<0.01)  | 2 (<0.01)   |
| First 5 years excluded (%)                  | 59 (0.05)   | 0 (0.04)    | 3 (0.03)    | 5 (0.03)   | 1 (0.03)    | 2 (0.05)   | 1 (0.02)    |

Abbreviations: N (number), BMI (body mass index), IQR (interquartile range), CLD (chronic liver disease), HCC (hepatocellular carcinoma)

**Supplementary table 7.** Baseline characteristics of the UK Biobank cohort and distribution of incident chronic liver disease, incident chronic liver disease or steatosis, death from chronic liver disease and incident hepatocellular carcinoma according to instant coffee consumption.

| <b>Coffee (cups/d)</b>               | <b>0</b> | <b>Half</b> | <b>1</b> | <b>2</b> | <b>3</b> | <b>4</b> | <b>≥5</b> |
|--------------------------------------|----------|-------------|----------|----------|----------|----------|-----------|
| N                                    | 109767   | 17152       | 50464    | 48606    | 34789    | 25383    | 36192     |
| Median age (years) at baseline (IQR) | 56 (13)  | 58 (12)     | 59 (12)  | 59 (13)  | 58 (13)  | 58 (13)  | 56 (13)   |
| Sex (% female)                       | 58.3     | 51.0        | 54.1     | 51.7     | 50.4     | 48.3     | 45.4      |
| <b>Ethnicity (%)</b>                 |          |             |          |          |          |          |           |
| White                                | 89.7     | 92.2        | 93.3     | 95.5     | 96.9     | 97.5     | 97.8      |
| Other ethnicity                      | 9.9      | 7.5         | 6.4      | 4.2      | 2.8      | 2.2      | 1.9       |
| Unknown                              | 0.4      | 0.3         | 0.3      | 0.3      | 0.3      | 0.3      | 0.3       |
| Median Townsend deprivation score    | -1.70    | -2.09       | -2.26    | -2.34    | -2.39    | -2.35    | -1.99     |
| <b>Alcohol frequency (%)</b>         |          |             |          |          |          |          |           |
| Never                                | 14.4     | 7.0         | 6.4      | 5.2      | 4.9      | 4.9      | 7.2       |
| Special occasions only               | 15.9     | 12.7        | 11.8     | 9.5      | 8.8      | 9.2      | 12.0      |



|                                             |             |            |             |             |             |            |            |
|---------------------------------------------|-------------|------------|-------------|-------------|-------------|------------|------------|
| One to three times a month                  | 12.6        | 12.7       | 11.3        | 10.4        | 10.2        | 10.1       | 11.9       |
| Once or twice a week                        | 24.9        | 27.4       | 28.1        | 27.5        | 26.7        | 26.9       | 25.9       |
| Three or four times a week                  | 17.6        | 21.9       | 23.1        | 25.4        | 26.1        | 25.7       | 22.1       |
| Daily or almost daily                       | 14.5        | 18.2       | 19.2        | 21.9        | 23.3        | 23.1       | 20.7       |
| Unknown                                     | 0.1         | 0.1        | 0.1         | 0.1         | 0.1         | 0.1        | 0.1        |
| Mean weekly units (IQR)                     | 11 (24.3)   | 15 (25.5)  | 15.2 (24.0) | 17.5 (24.5) | 18.5 (24.8) | 19.5 (26)  | 18 (28.5)  |
| <b>Diabetes (%)</b>                         |             |            |             |             |             |            |            |
| Yes                                         | 5.7         | 5.6        | 5.4         | 5.2         | 5.3         | 5.4        | 5.7        |
| No                                          | 93.9        | 94.1       | 94.3        | 94.6        | 94.5        | 94.3       | 94.1       |
| Unknown                                     | 0.4         | 0.3        | 0.3         | 0.2         | 0.2         | 0.3        | 0.3        |
| <b>Median BMI in kg/m<sup>2</sup> (IQR)</b> | 26.8 (6.1)  | 26.8 (5.7) | 26.7 (5.6)  | 26.9 (5.6)  | 27.0 (5.6)  | 27.3 (5.7) | 27.6 (5.9) |
| <b>Smoking (%)</b>                          |             |            |             |             |             |            |            |
| Never                                       | 58.6        | 56.0       | 56.3        | 53.8        | 52.3        | 48.6       | 39.8       |
| Previous                                    | 31.3        | 34.1       | 35.0        | 36.0        | 36.4        | 37.2       | 35.5       |
| Current                                     | 9.7         | 9.5        | 8.2         | 9.8         | 11.0        | 13.9       | 24.3       |
| Unknown                                     | 0.4         | 0.4        | 0.4         | 0.4         | 0.4         | 0.3        | 0.4        |
| <b>CLD cases (n)</b>                        |             |            |             |             |             |            |            |
| Total (%)                                   | 927 (0.84)  | 162 (0.94) | 401 (0.79)  | 384 (0.79)  | 237 (0.68)  | 171 (0.67) | 270 (0.75) |
| First 5 years excluded (%)                  | 449 (0.41)  | 72 (0.42)  | 186 (0.37)  | 193 (0.40)  | 115 (0.33)  | 76 (0.30)  | 144 (0.40) |
| <b>CLD or steatosis cases (n)</b>           |             |            |             |             |             |            |            |
| Total (%)                                   | 1412 (1.29) | 222 (1.29) | 604 (1.20)  | 564 (1.16)  | 353 (1.01)  | 256 (1.01) | 427 (1.18) |
| First 5 years excluded (%)                  | 724 (0.66)  | 104 (0.61) | 302 (0.60)  | 293 (0.60)  | 188 (0.54)  | 120 (0.47) | 232 (0.64) |
| <b>HCC cases (n)</b>                        |             |            |             |             |             |            |            |
| Total (%)                                   | 44 (0.04)   | 8 (0.05)   | 17 (0.03)   | 28 (0.06)   | 16 (0.05)   | 9 (0.04)   | 12 (0.03)  |
| First 5 years excluded (%)                  | 28 (0.03)   | 6 (0.03)   | 12 (0.02)   | 12 (0.02)   | 8 (0.02)    | 5 (0.02)   | 8 (0.02)   |
| <b>CLD deaths</b>                           |             |            |             |             |             |            |            |
| Total (%)                                   | 97 (<0.01)  | 15 (<0.01) | 38 (<0.01)  | 39 (<0.01)  | 22 (<0.01)  | 8 (<0.01)  | 18 (<0.01) |
| First 5 years excluded (%)                  | 59 (0.09)   | 8 (0.09)   | 24 (0.08)   | 27 (0.08)   | 17 (0.06)   | 4 (0.03)   | 13 (0.05)  |

Abbreviations: N (number), BMI (body mass index), IQR (interquartile range), CLD (chronic liver disease), HCC (hepatocellular carcinoma)

**Supplementary table 8.** Baseline characteristics of the UK Biobank cohort and distribution of incident chronic liver disease, incident chronic liver disease or steatosis, death from chronic liver disease and incident hepatocellular carcinoma according to ground coffee consumption.

| Coffee (cups/d)                             | 0           | Half        | 1          | 2           | 3          | 4           | ≥5         |
|---------------------------------------------|-------------|-------------|------------|-------------|------------|-------------|------------|
| N                                           | 109767      | 9651        | 25608      | 24644       | 13235      | 7162        | 6687       |
| Median age (years) at baseline (IQR)        | 56 (13)     | 56 (13)     | 57 (13)    | 58 (13)     | 57 (13)    | 57 (13)     | 56 (13)    |
| Sex (% female)                              | 58.3        | 55.0        | 56.4       | 52.8        | 48.4       | 44.3        | 39.4       |
| <b>Ethnicity (%)</b>                        |             |             |            |             |            |             |            |
| White                                       | 89.7        | 95.1        | 95.3       | 96.3        | 96.5       | 96.8        | 96.9       |
| Other ethnicity                             | 9.9         | 4.4         | 4.3        | 3.2         | 2.9        | 2.6         | 2.6        |
| Unknown                                     | 0.4         | 0.5         | 0.4        | 0.4         | 0.6        | 0.5         | 0.5        |
| Median Townsend deprivation score           | -1.70       | -2.11       | -2.02      | -2.06       | -2.13      | -2.17       | -2.00      |
| <b>Alcohol frequency (%)</b>                |             |             |            |             |            |             |            |
| Never                                       | 14.4        | 3.8         | 3.9        | 3.4         | 3.7        | 4.6         | 6.7        |
| Special occasions only                      | 15.9        | 7.2         | 6.4        | 5.4         | 5.2        | 5.7         | 7.2        |
| One to three times a month                  | 12.6        | 11.1        | 8.5        | 7.2         | 6.6        | 7.4         | 9.4        |
| Once or twice a week                        | 24.9        | 25.1        | 23.7       | 21.4        | 20.3       | 19.7        | 20.9       |
| Three or four times a week                  | 17.6        | 29.0        | 28.7       | 29.3        | 29.5       | 29.2        | 25.5       |
| Daily or almost daily                       | 14.5        | 23.7        | 28.8       | 33.2        | 34.8       | 33.4        | 30.3       |
| Unknown                                     | 0.1         | 0           | 0          | 0           | 0          | 0           | 0.1        |
| Mean weekly units (IQR)                     | 11 (24.3)   | 18.2 (24.5) | 19 (23.8)  | 20.8 (24.8) | 21.8 (26)  | 22.5 (27.5) | 22.5 (30)  |
| <b>Diabetes (%)</b>                         |             |             |            |             |            |             |            |
| Yes                                         | 5.7         | 4.0         | 3.5        | 3.4         | 3.7        | 4.8         | 5.8        |
| No                                          | 93.9        | 95.8        | 96.3       | 96.4        | 96.1       | 94.9        | 94.1       |
| Unknown                                     | 0.4         | 0.2         | 0.2        | 0.2         | 0.2        | 0.3         | 0.2        |
| <b>Median BMI in kg/m<sup>2</sup> (IQR)</b> | 26.8 (6.1)  | 25.9 (5.5)  | 25.7 (5.3) | 25.9 (5.3)  | 26.1 (5.2) | 26.7 (5.4)  | 27.2 (5.7) |
| <b>Smoking (%)</b>                          |             |             |            |             |            |             |            |
| Never                                       | 58.6        | 57.1        | 55.3       | 53.8        | 52         | 49.9        | 44.7       |
| Previous                                    | 31.3        | 35.1        | 37.5       | 37.6        | 37.7       | 37.5        | 35.9       |
| Current                                     | 9.7         | 7.5         | 7.0        | 8.4         | 10.1       | 12.3        | 19.1       |
| Unknown                                     | 0.4         | 0.2         | 0.2        | 0.3         | 0.2        | 0.3         | 0.4        |
| <b>CLD cases (n)</b>                        |             |             |            |             |            |             |            |
| Total                                       | 927 (0.84)  | 48 (0.50)   | 150 (0.59) | 138 (0.56)  | 66 (0.50)  | 36 (0.50)   | 39 (0.58)  |
| First 5 years excluded                      | 449 (0.41)  | 28 (0.29)   | 63 (0.25)  | 67 (0.27)   | 30 (0.23)  | 15 (0.21)   | 23 (0.34)  |
| <b>CLD or steatosis cases (n)</b>           |             |             |            |             |            |             |            |
| Total (%)                                   | 1412 (1.29) | 67 (0.69)   | 216 (0.84) | 198 (0.80)  | 90 (0.68)  | 54 (0.75)   | 67 (1.00)  |
| First 5 years excluded (%)                  | 724 (0.66)  | 38 (0.39)   | 98 (0.38)  | 99 (0.40)   | 41 (0.31)  | 26 (0.36)   | 41 (0.61)  |
| <b>HCC cases (n)</b>                        |             |             |            |             |            |             |            |
| Total (%)                                   | 44 (0.04)   | 2 (0.02)    | 7 (0.03)   | 4 (0.02)    | 2 (0.02)   | 2 (0.03)    | 3 (0.04)   |
| First 5 years excluded (%)                  | 28 (0.03)   | 1 (0.01)    | 3 (0.01)   | 3 (0.01)    | 1 (0.01)   | 0 (0.00)    | 3 (0.04)   |
| <b>CLD deaths</b>                           |             |             |            |             |            |             |            |
| Total (%)                                   | 97 (<0.01)  | 2 (<0.01)   | 6 (<0.01)  | 10 (<0.01)  | 3 (<0.01)  | 4 (<0.01)   | 8 (<0.01)  |
| First 5 years excluded (%)                  | 59 (0.09)   | 1 (0.02)    | 3 (0.02)   | 9 (0.04)    | 1 (0.02)   | 2 (0.06)    | 6 (0.12)   |

Abbreviations: N (number), BMI (body mass index), IQR (interquartile range), CLD (chronic liver disease), HCC (hepatocellular carcinoma)

**Supplementary table 9.** Age and sex adjusted hazard ratios with 95% confidence intervals for associations of covariates with incident chronic liver disease and death from chronic liver disease.

| Covariate | HR of incident CLD | HR of death from CLD |
|-----------|--------------------|----------------------|
|-----------|--------------------|----------------------|

|                                                                                                                             |                                                                      |                                                                      |
|-----------------------------------------------------------------------------------------------------------------------------|----------------------------------------------------------------------|----------------------------------------------------------------------|
| <b>Townsend deprivation (quartiles)</b><br>1 <sup>st</sup><br>2 <sup>nd</sup><br>3 <sup>rd</sup><br>4 <sup>th</sup>         | 1 (ref.)<br>1.16 (1.05-1.28)<br>1.34 (1.21-1.47)<br>1.86 (1.70-2.05) | 1 (ref.)<br>1.10 (0.75-1.61)<br>1.59 (1.11-2.27)<br>2.68 (1.93-3.72) |
| <b>Ethnicity (%)</b><br>White<br>Other ethnicity                                                                            | 1 (ref.)<br>1.35 (0.84-2.17)                                         | 1 (ref.)<br>1.69 (0.42-6.80)                                         |
| <b>Smoking status (%)</b><br>No<br>Previous smoker<br>Current smoker                                                        | 1 (ref.)<br>1.32 (1.23-1.42)<br>2.31 (2.10-2.53)                     | 1 (ref.)<br>1.70 (1.29-2.24)<br>4.80 (3.58-6.45)                     |
| <b>Diabetes (%)</b><br>No<br>Yes                                                                                            | 1 (ref.)<br>2.92 (2.66-3.20)                                         | 1 (ref.)<br>4.00 (3.03-5.28)                                         |
| <b>BMI (kg/m<sup>2</sup>)</b><br><25<br>25-<30<br>≥30                                                                       | 1 (ref.)<br>1.02 (0.94-1.11)<br>1.76 (1.62-1.92)                     | 1 (ref.)<br>0.69 (0.51-0.93)<br>1.84 (1.39-2.45)                     |
| <b>Weekly alcohol units</b><br>≤14<br>>14-≤35 (women) / >14-≤50<br>>35 Women / >50 Men                                      | 1 (ref.)<br>0.90 (0.83-0.98)<br>1.67 (1.51-1.84)                     | 1 (ref.)<br>0.87 (0.63-1.21)<br>3.90 (2.89-5.26)                     |
| <b>Alcohol frequency</b><br>Less than weekly<br>Once or twice a week<br>Three or four times a week<br>Daily or almost daily | 1 (ref.)<br>0.73 (0.67-0.80)<br>0.73 (0.66-0.80)<br>1.11 (1.02-1.21) | 1 (ref.)<br>0.57 (0.38-0.88)<br>0.87 (0.60-1.27)<br>2.72 (2.00-3.69) |

Abbreviations: BMI (body mass index), CLD (chronic liver disease), HR (hazard ratio)

**Supplementary table 10.** Adjusted hazard ratios with 95% confidence intervals for associations of coffee consumption with incident chronic liver disease.

|                                 | <b>HR</b>                     | <b>n</b> |
|---------------------------------|-------------------------------|----------|
| Diabetes                        | 0.76 (0.60-0.95) <sup>1</sup> | 17280    |
| No diabetes                     | 0.80 (0.72-0.88) <sup>1</sup> | 371905   |
| BMI<25 (mg/kg <sup>2</sup> )    | 0.77 (0.65-0.92) <sup>2</sup> | 132334   |
| BMI 25-30 (mg/kg <sup>2</sup> ) | 0.78 (0.68-0.90) <sup>2</sup> | 168026   |
| BMI >30 (mg/kg <sup>2</sup> )   | 0.82 (0.71-0.95) <sup>2</sup> | 88825    |

Abbreviations: BMI (body mass index), HR (hazard ratio). <sup>1</sup>adjusted for age, sex (male, female), deprivation (Townsend score), smoking status (never, current or previous), ethnicity (white or other ethnicity) and weekly alcohol units and BMI. <sup>2</sup>adjusted for age, sex (male or female), deprivation (Townsend score), smoking status (never, current or previous), diabetes (yes or no), ethnicity (white or other ethnicity) and weekly alcohol units and BMI.
